# Supplementary figures and images for: A multi-body finite element model for hydrogel packings: linear response to shear
Source: Royal Society of Chemistry journal article supplement (doi:10.1039/d4sm00916a), 2025-01-01

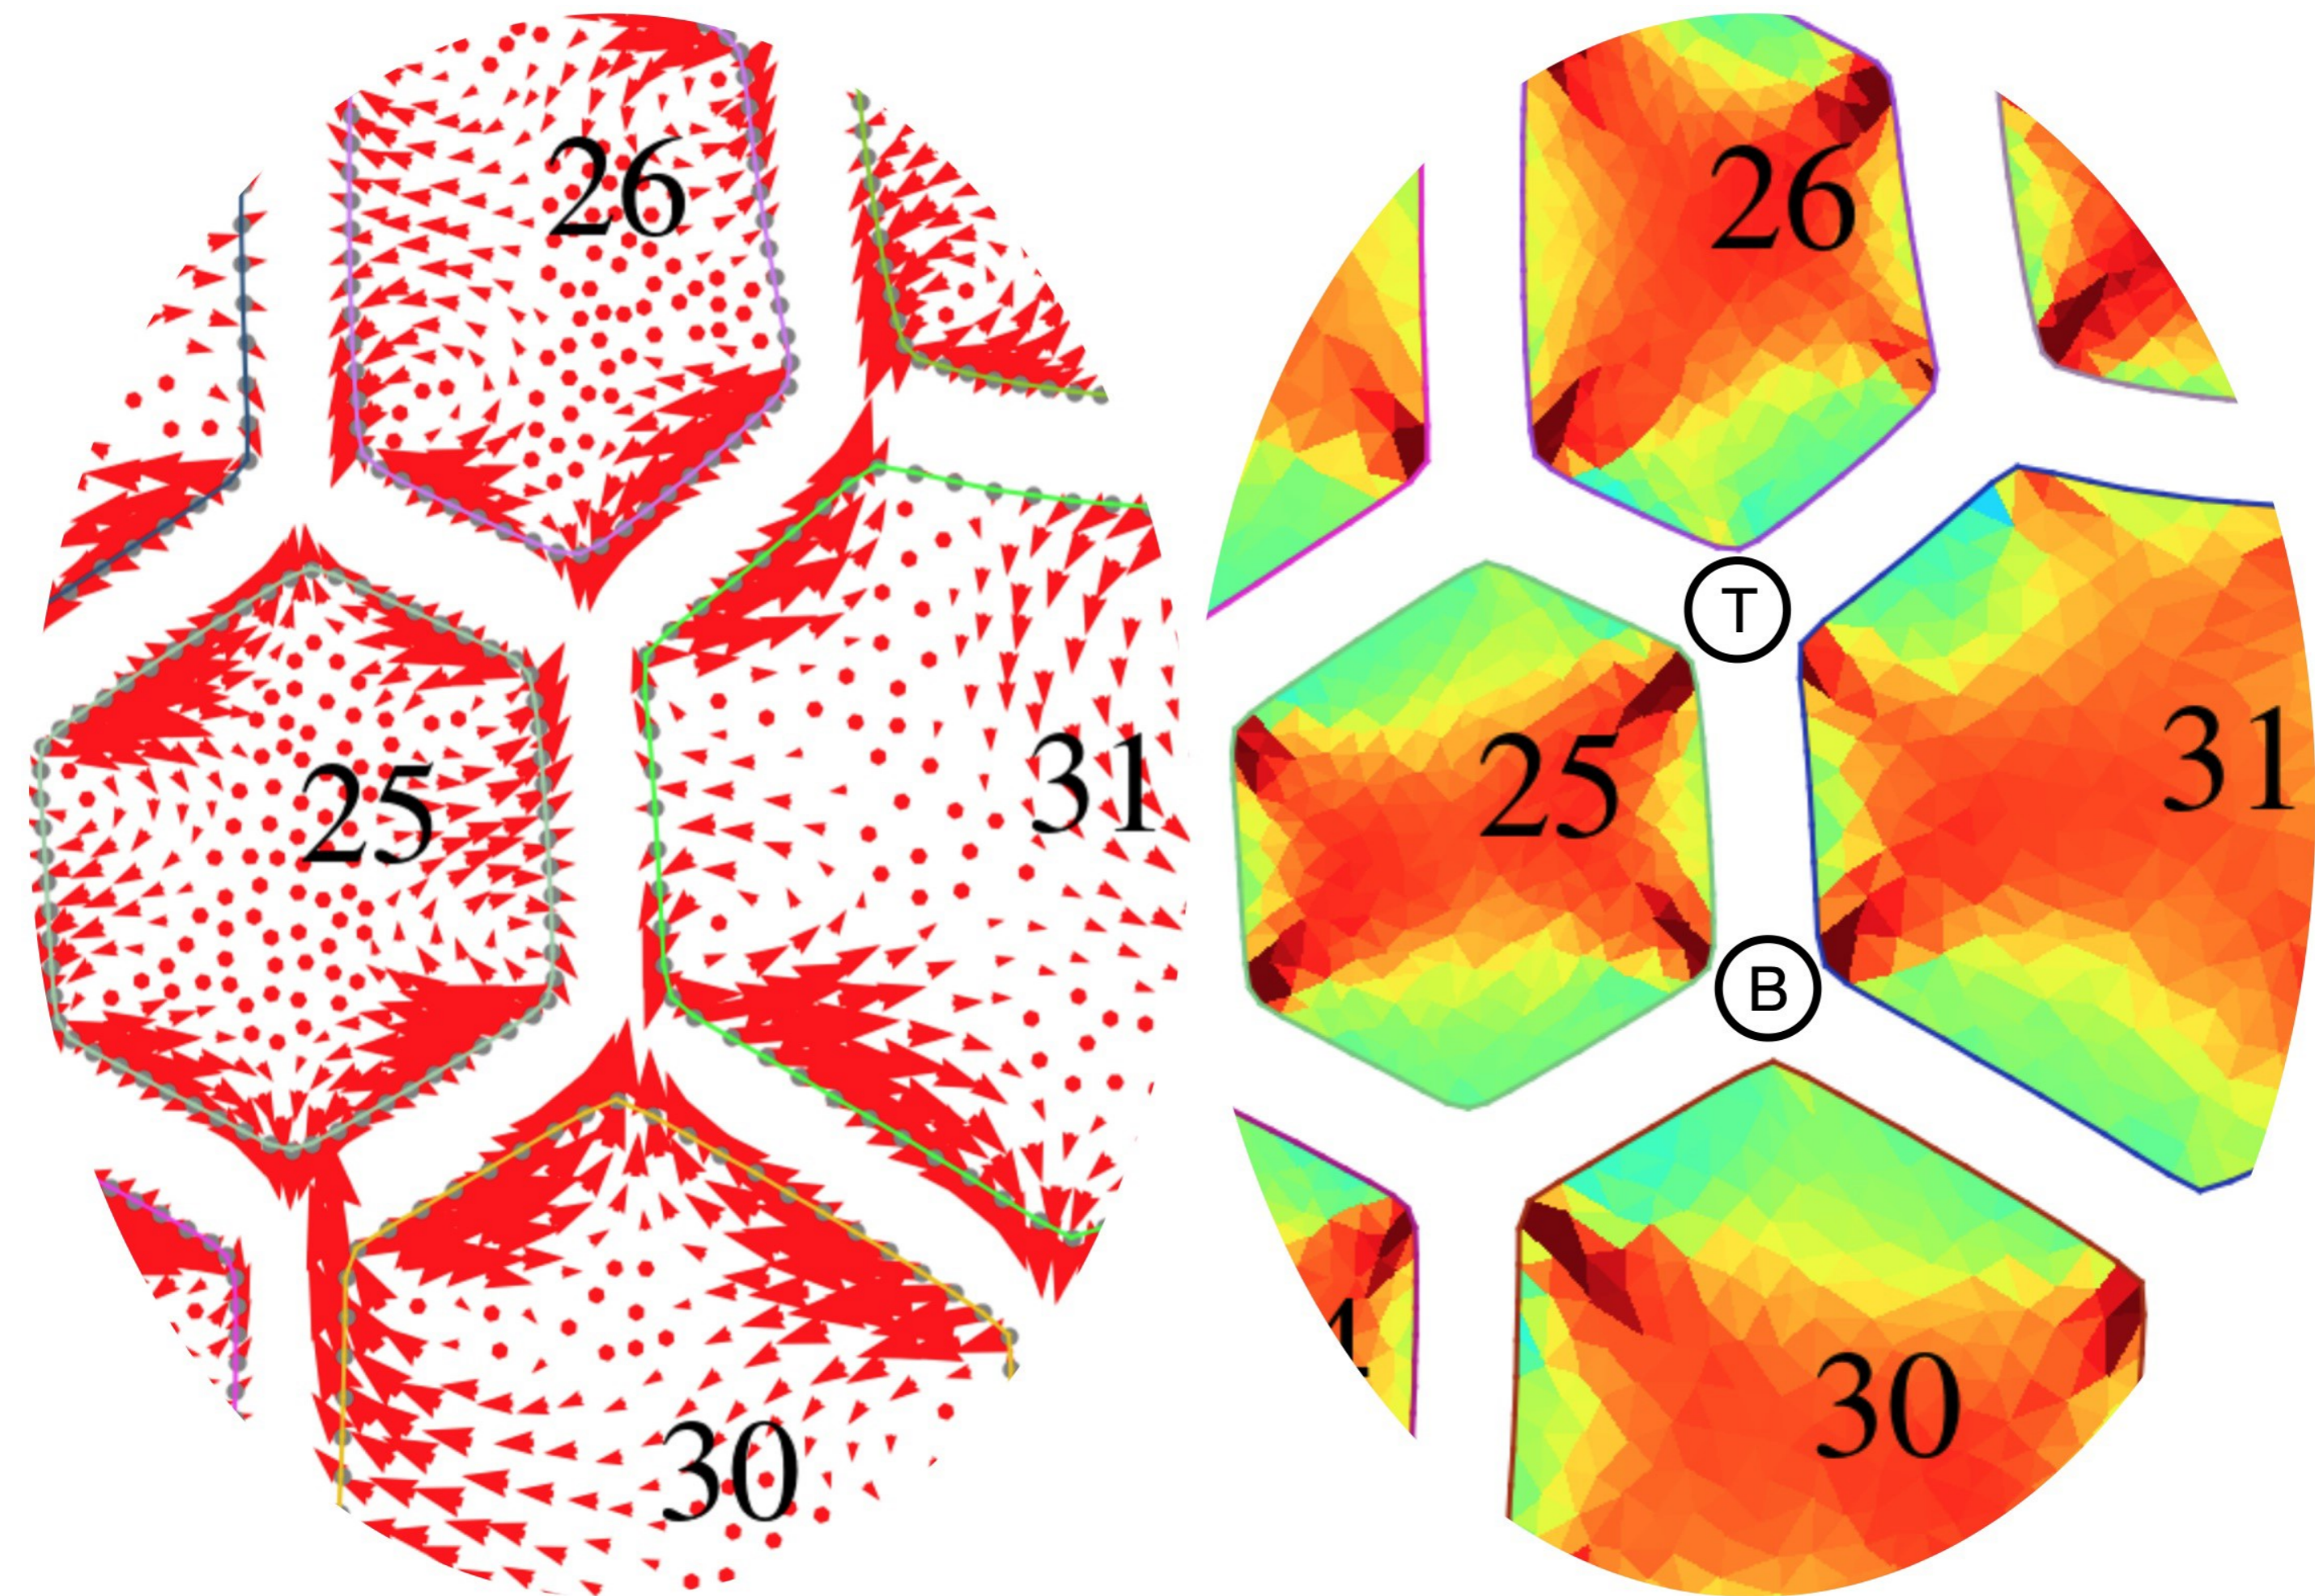

Supplement: d4sm00916a1.pdf [file d4sm00916a1.pdf]

(a)

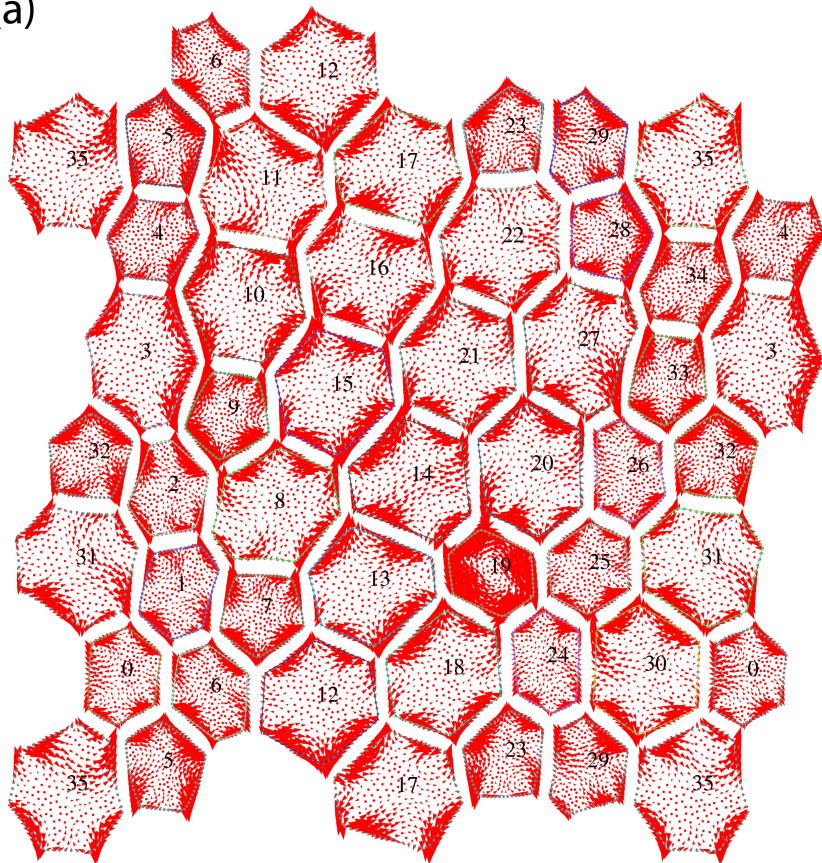

Supplement: d4sm00916a10.pdf [file d4sm00916a10.pdf]

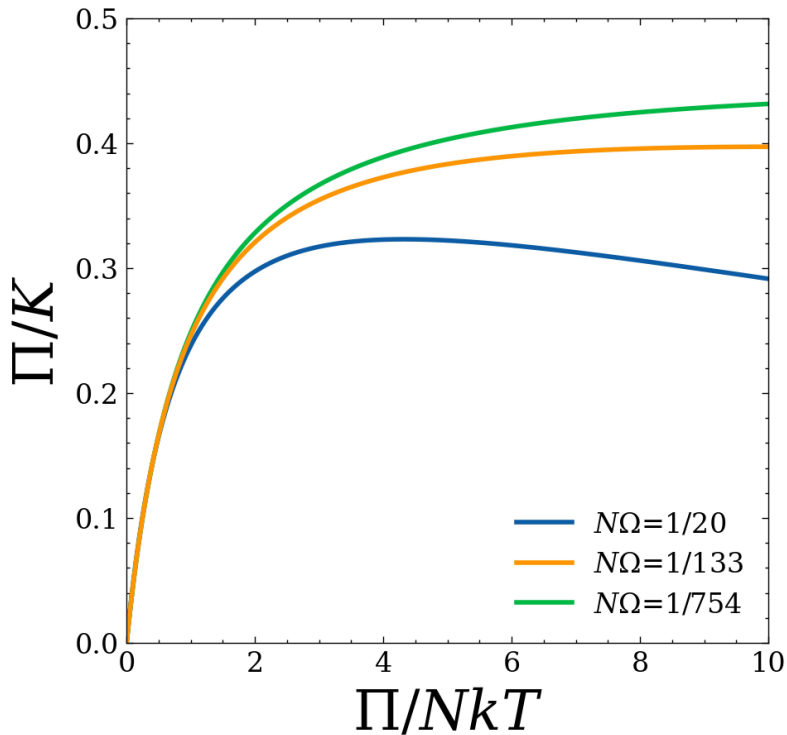

(b)

Supplement: d4sm00916a12.pdf [file d4sm00916a12.pdf]

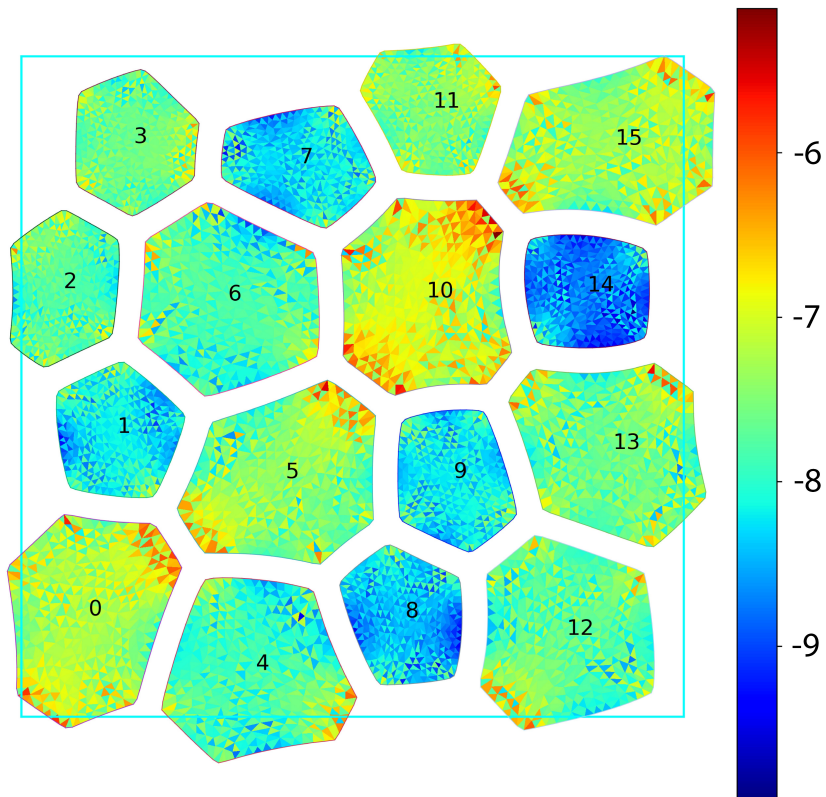

Supplement: d4sm00916a13.pdf [file d4sm00916a13.pdf]

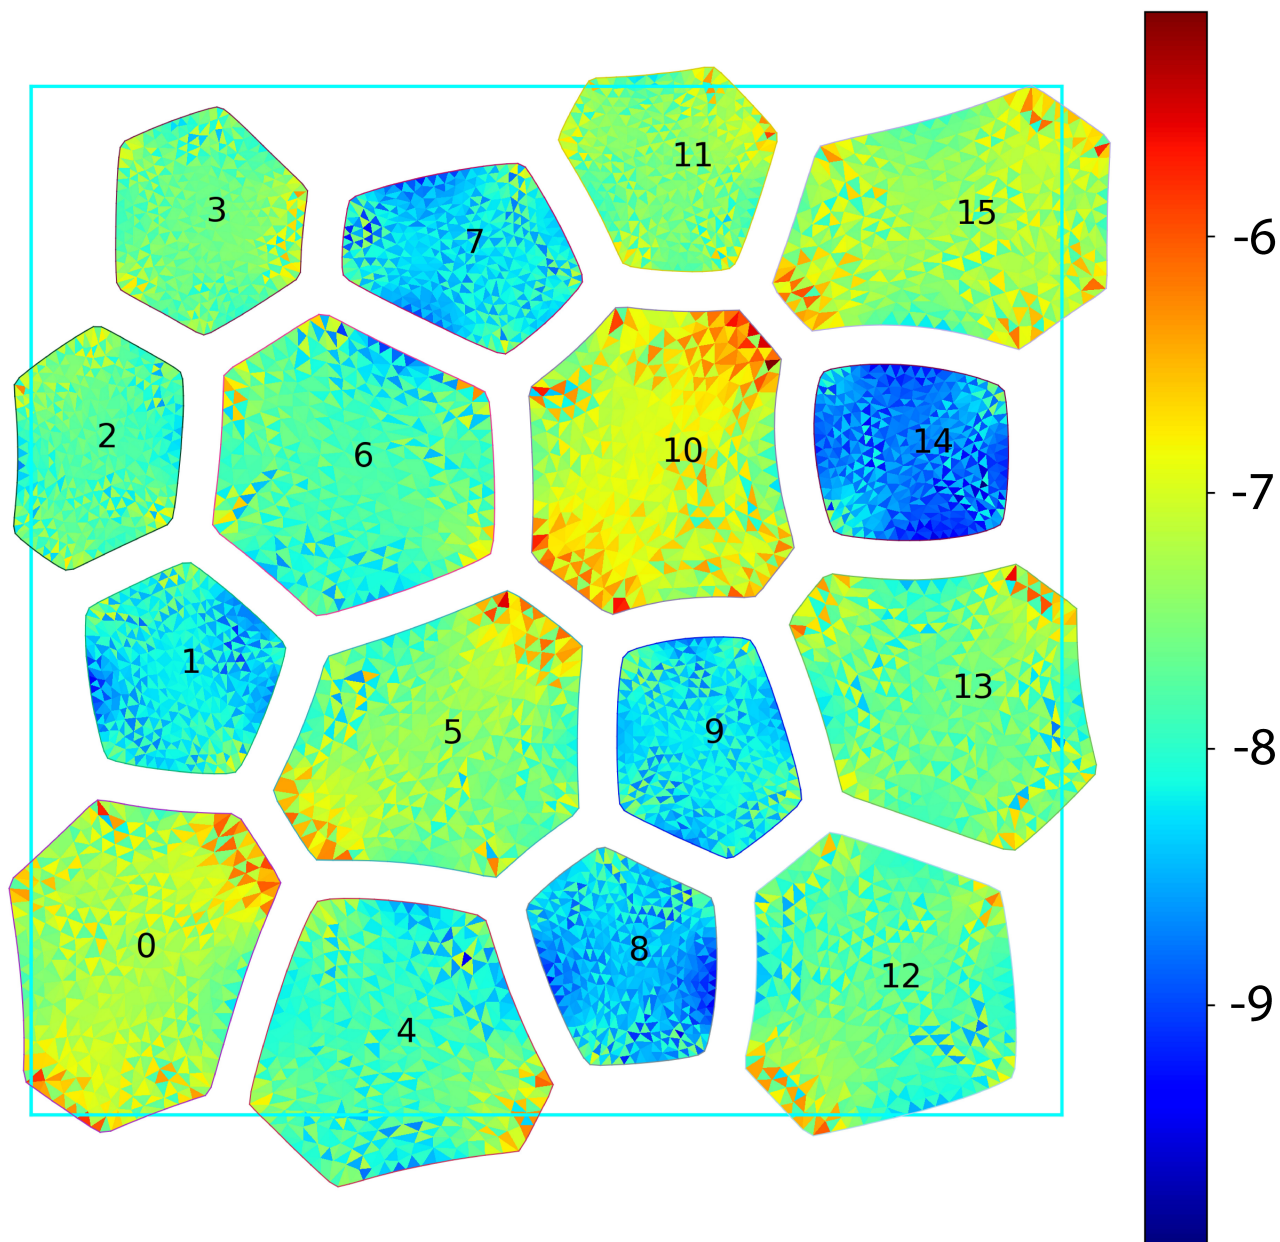

Supplement: d4sm00916a14.pdf [file d4sm00916a14.pdf]

(b)

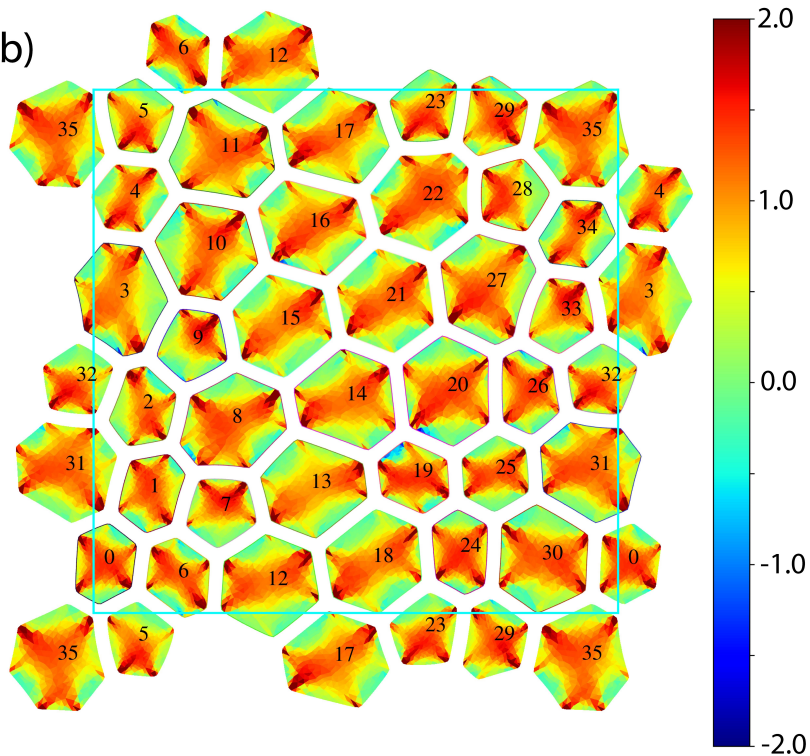

Supplement: d4sm00916a15.pdf [file d4sm00916a15.pdf]

(b)

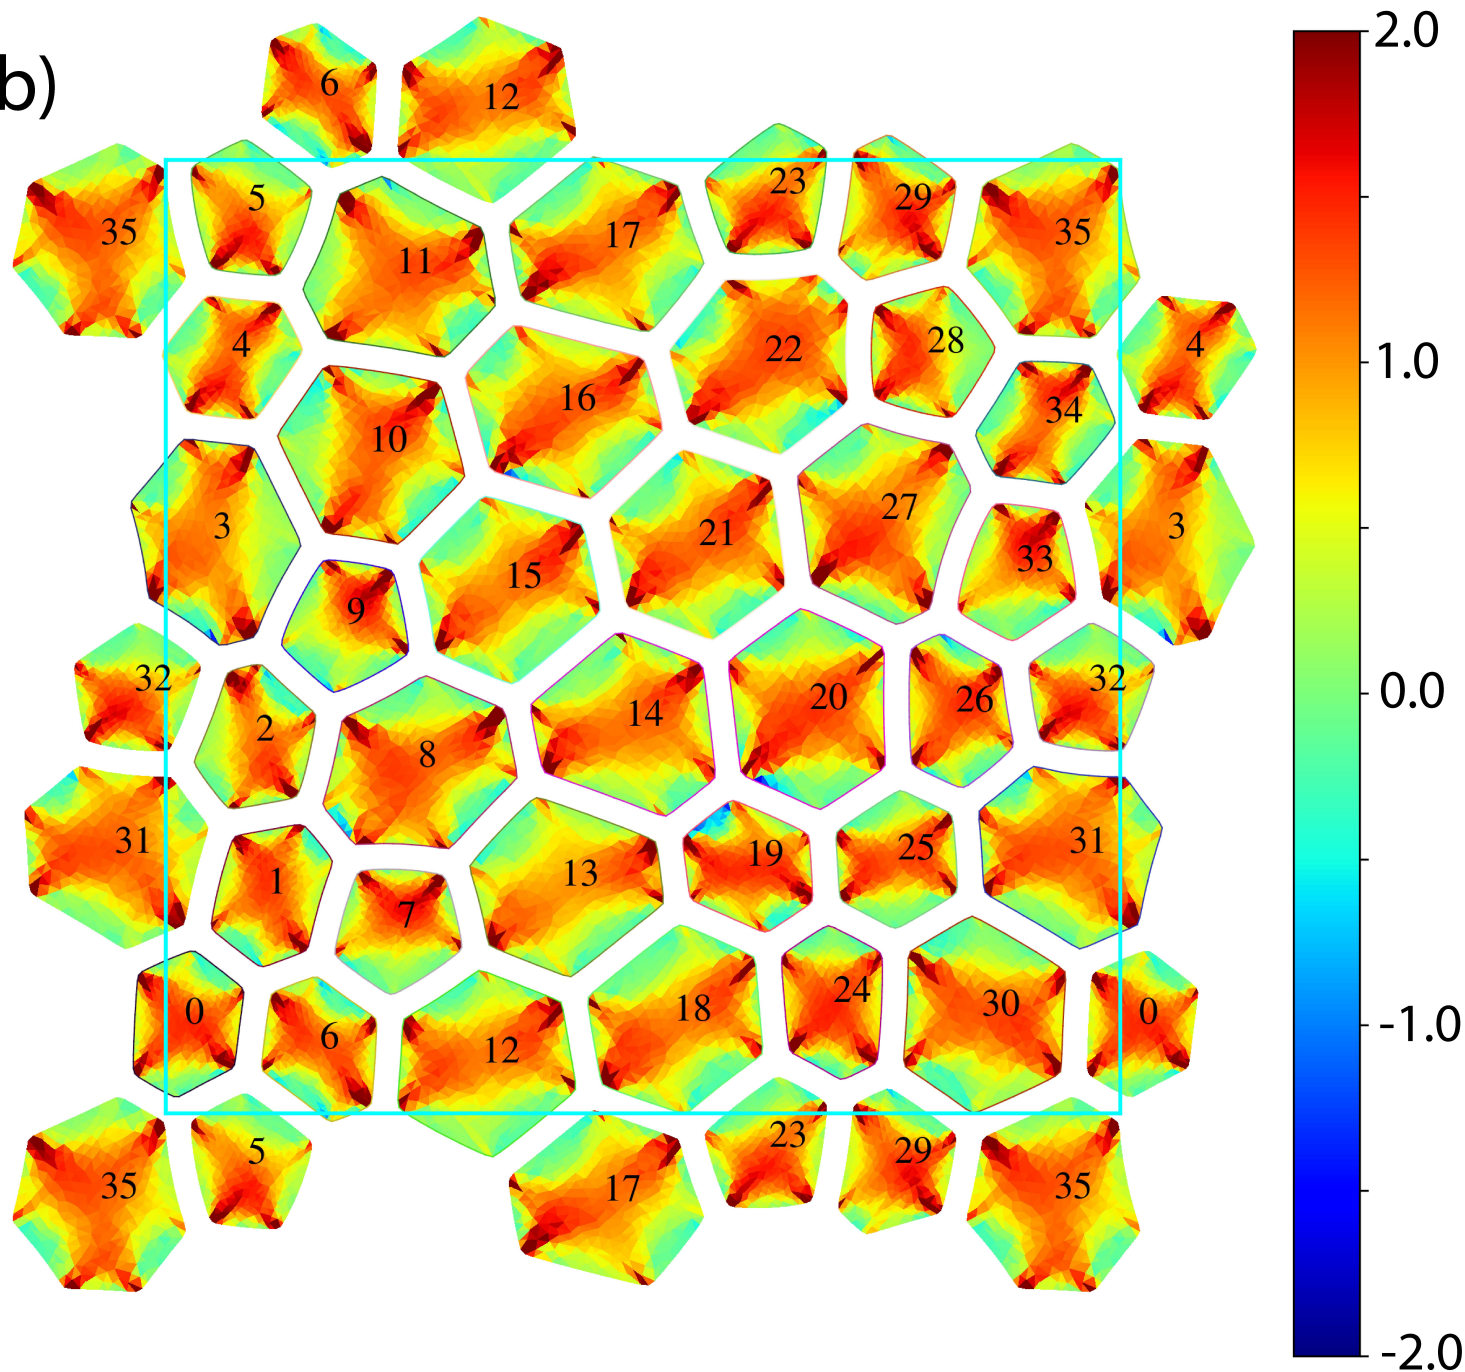

Supplement: d4sm00916a16.pdf [file d4sm00916a16.pdf]

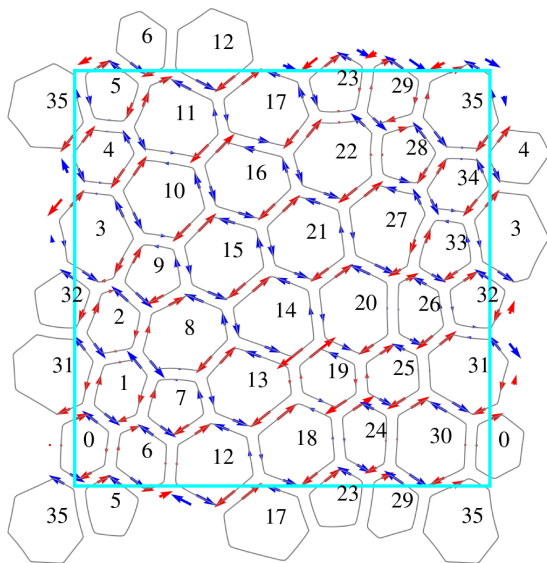

scale:  $\rightarrow 1.0$

(b)

Supplement: d4sm00916a2.pdf [file d4sm00916a2.pdf]

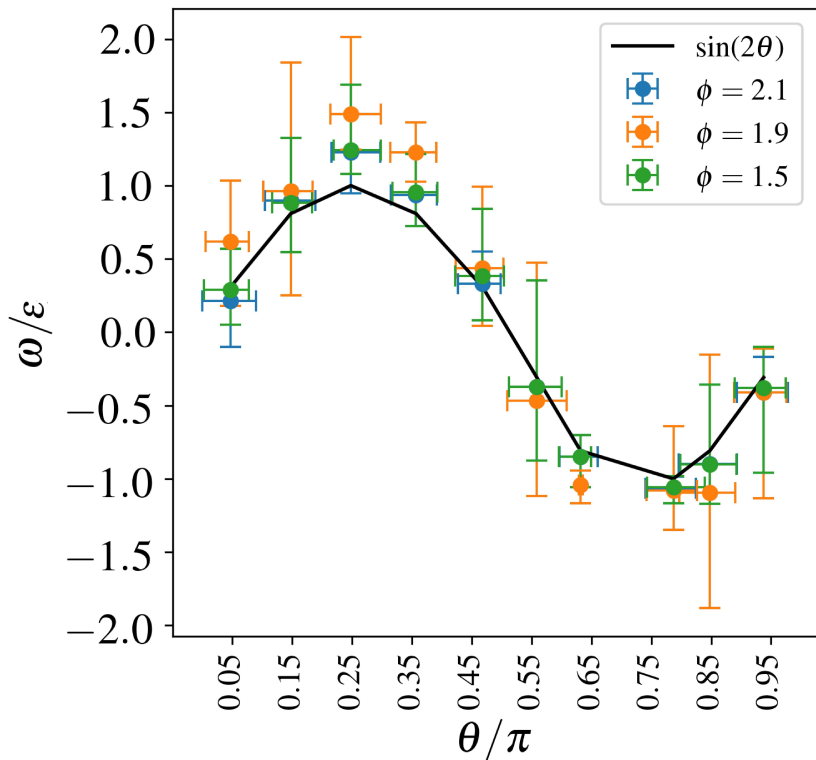

(a)

Supplement: d4sm00916a3.pdf [file d4sm00916a3.pdf]

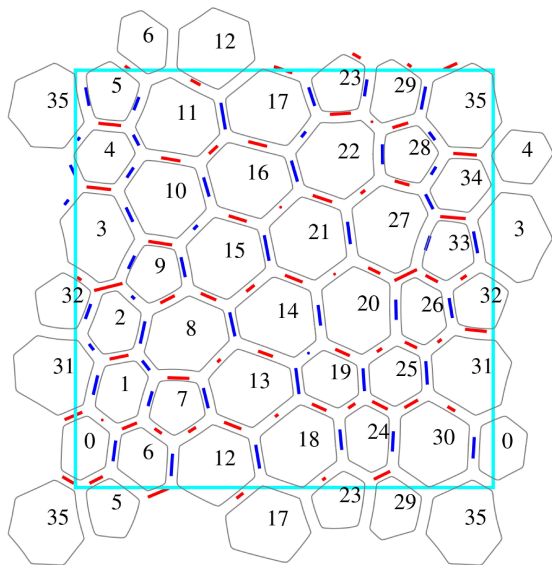

scale: - 1.0

(b)

Supplement: d4sm00916a4.pdf [file d4sm00916a4.pdf]

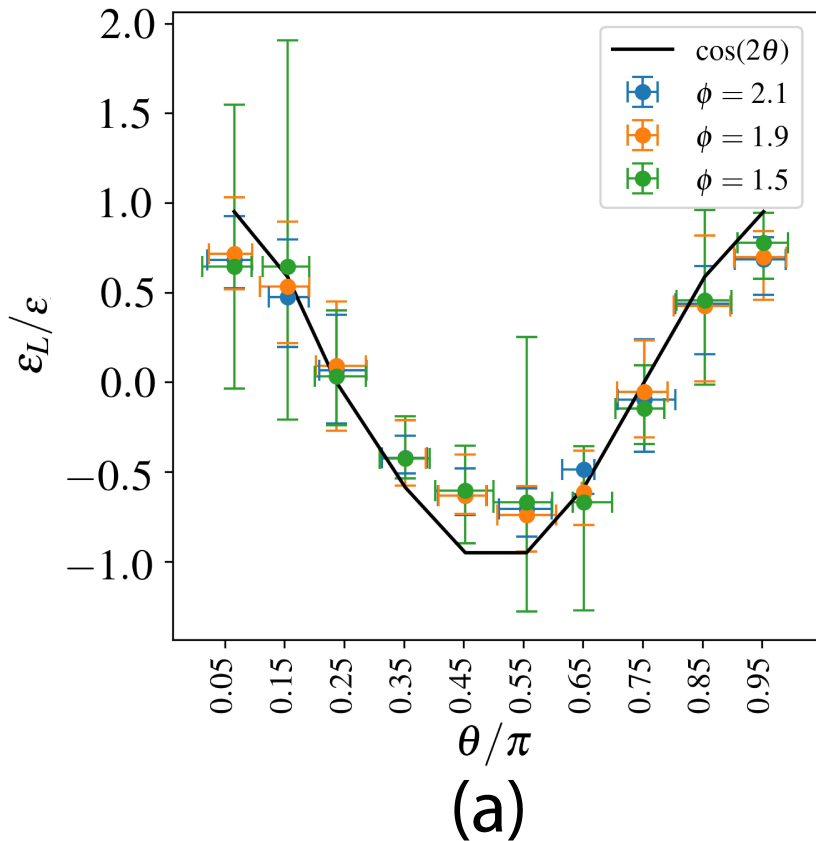

Supplement: d4sm00916a5.pdf [file d4sm00916a5.pdf]

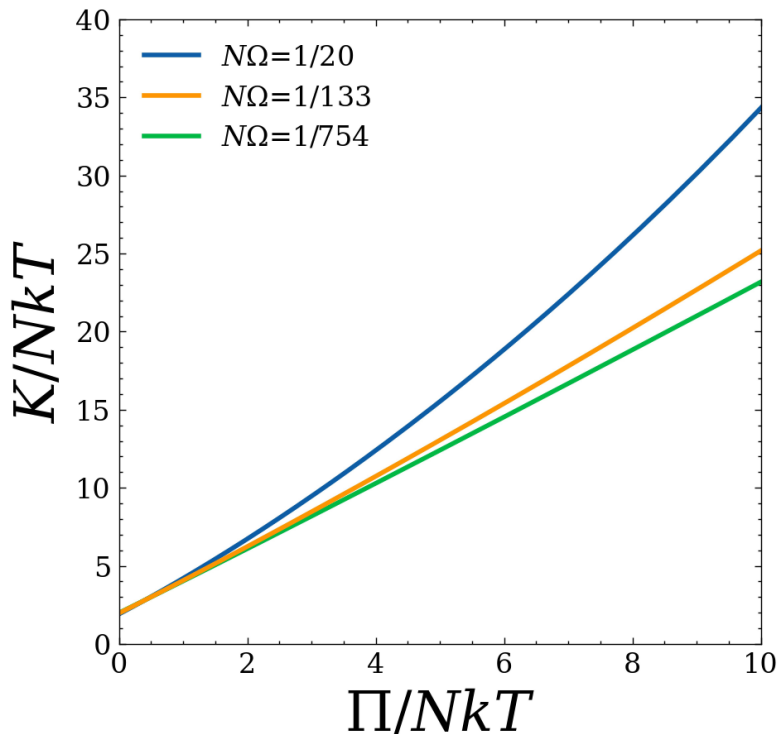

(a)

Supplement: d4sm00916a6.pdf [file d4sm00916a6.pdf]

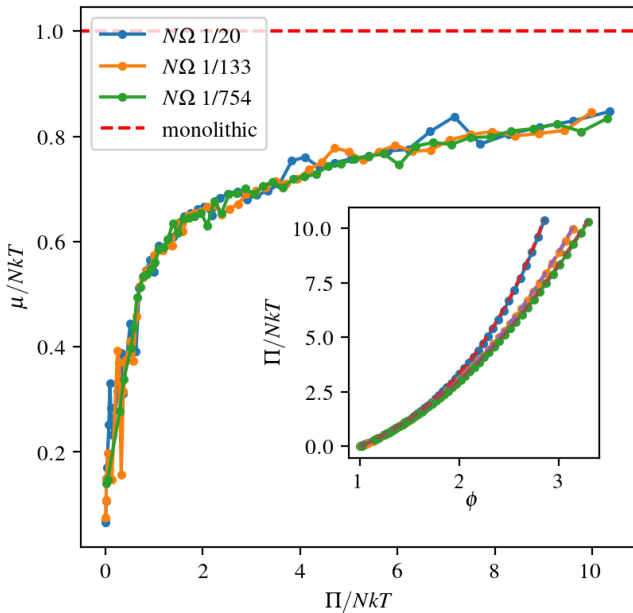

Supplement: d4sm00916a7.pdf [file d4sm00916a7.pdf]

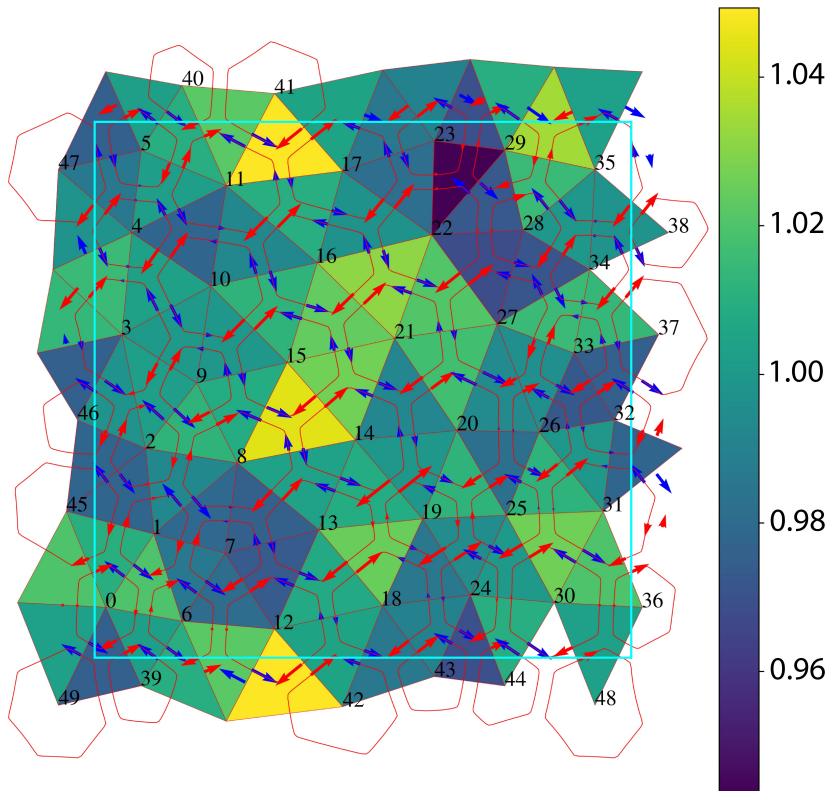

Supplement: d4sm00916a8.pdf [file d4sm00916a8.pdf]

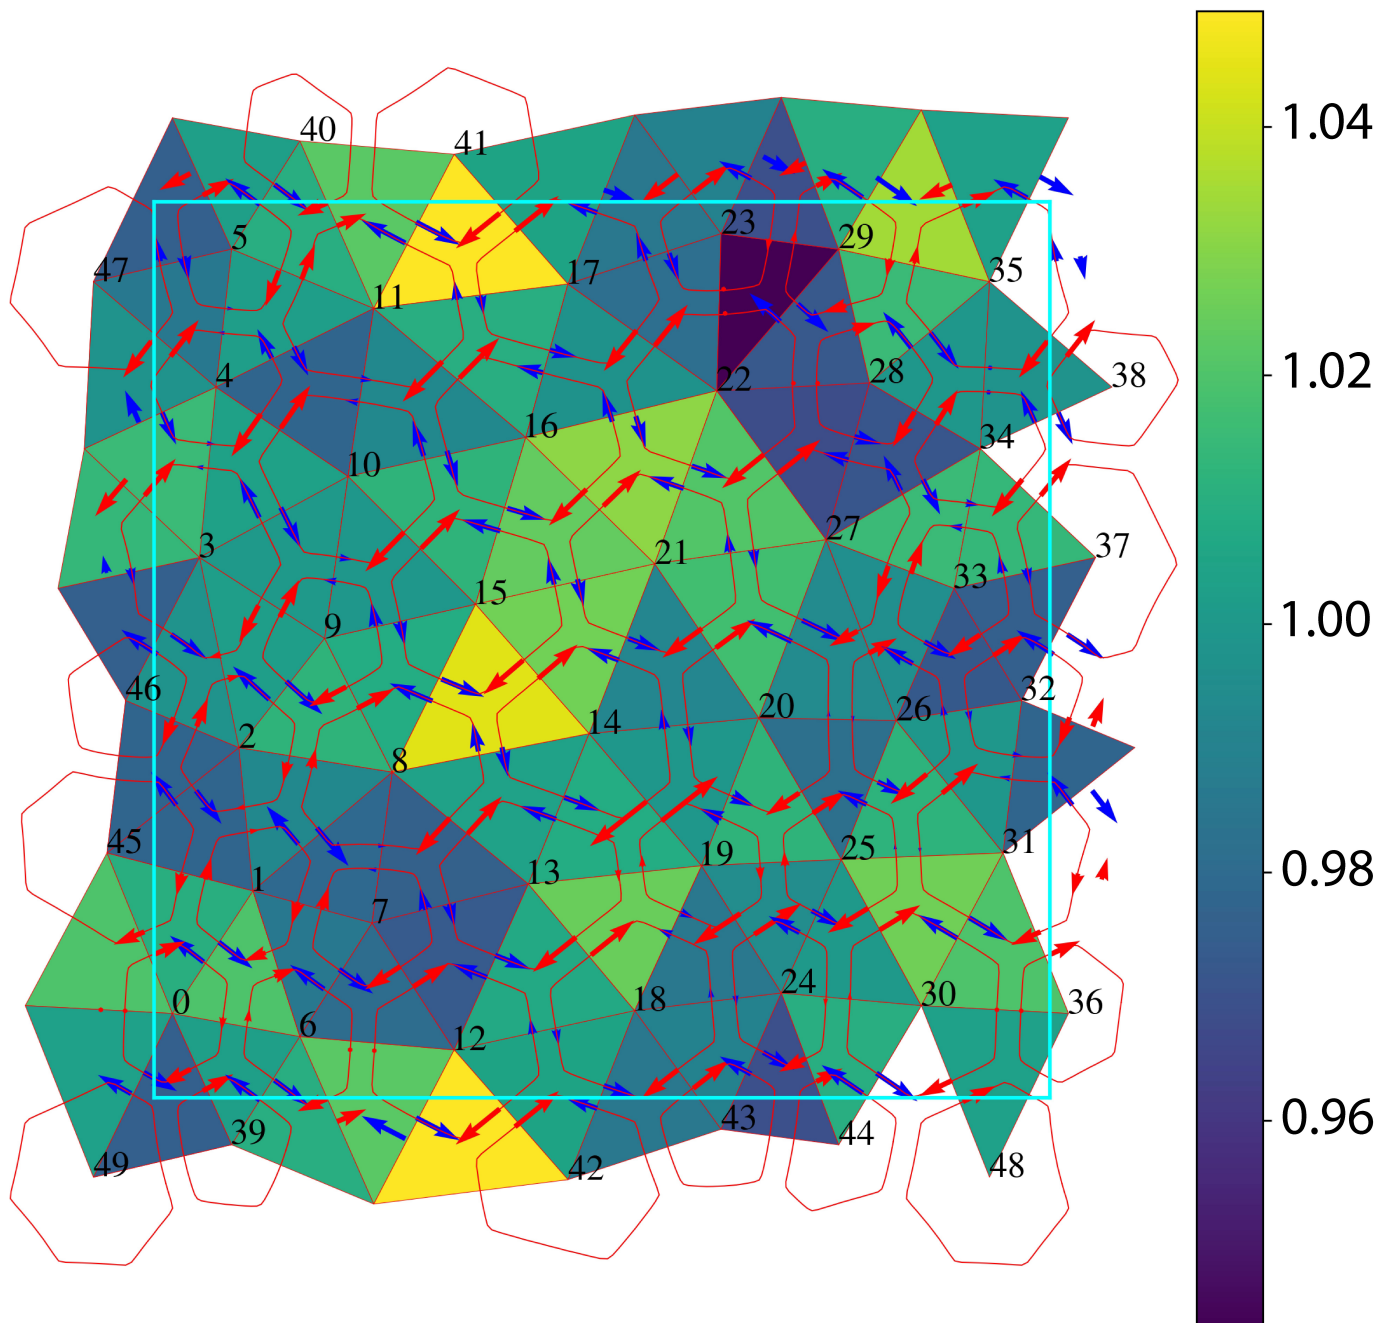

Supplement: d4sm00916a9.pdf [file d4sm00916a9.pdf]
